# Supplementary material
Source: publisher figshare collection journal article supplement (https://frontiersin.figshare.com/ndownloader/files/13662227)
Supplement: Supplementary file 1 [file 13662227]

|  | Coral bleaching susceptibility (Taxon-BRI) | Fraction of coenosteum – light leaking into corallite () | Average irradiance at the corallite surface | Fraction of average corallite irradiance due to coenosteum light transport |
| --- | --- | --- | --- | --- |
| *Montastraea cavernosa* | 14 | 6% | 0.04 | 5% |
| *Seriatopora caliendrum* | 52 | 43% | 0.07 | 46% |
| *Montipora informis* | 73 | 35% | 0.2 | 64% |

Table S3.
